# Supplementary material for: Evaluating Contextual Processing in Diffusion MRI: Application to Optic Radiation Reconstruction for Epilepsy Surgery
Source: PubMed Central journal article supplement (PMC4117467; doi:10.1371/journal.pone.0101524), 2014-07-31
Supplement: pone.0101524.s001.pdf [file pone.0101524.s001.pdf]

## Appendix S1: Abbreviation table

|                                                                 |                                                                                                                                    |
|-----------------------------------------------------------------|------------------------------------------------------------------------------------------------------------------------------------|
| $SE(n)$                                                         | n-dimensional special Euclidean motion group                                                                                       |
| $\mathbb{R}^n$                                                  | n-dimensional position space                                                                                                       |
| $SO(n)$                                                         | n-dimensional rotation group                                                                                                       |
| $S^n$                                                           | n-dimensional sphere                                                                                                               |
| $[D^{ij}] \in \mathbb{R}^{5 \times 5}$                          | Components of diffusion matrix for diffusion processes on $\mathbb{R}^3 \times S^2$                                                |
| $[G^{ij}] \in \mathbb{R}^{5 \times 5}$                          | Components of left-invariant inverse metric tensor on $\mathbb{R}^3 \times S^2$ for erosion processes on $\mathbb{R}^3 \times S^2$ |
| $\mathbf{n} = \mathbf{n}(\beta, \gamma) \in S^2$                | Orientation                                                                                                                        |
| $R_{\mathbf{n}}$                                                | Rotation matrix which maps $\mathbf{e}_z$ to $\mathbf{n}$                                                                          |
| $\{\mathcal{A}_i\}_{i=1}^5$                                     | Local frame of reference                                                                                                           |
| $(\mathbf{x}, \mathbf{n}) \mapsto U(\mathbf{x}, \mathbf{n})$    | Function $U$ on $\mathbb{R}^3 \times S^2$                                                                                          |
| $(\mathbf{x}, \mathbf{n}) \mapsto W(\mathbf{x}, \mathbf{n}, t)$ | $W(\cdot, t)$ on $\mathbb{R}^3 \times S^2$ at time $t > 0$                                                                         |
| $\{N_t\}$                                                       | Random variable denoting the direction in $S^2$                                                                                    |
| $\{X_t\}$                                                       | Random variable denoting the position in $\mathbb{R}^3$                                                                            |
| BOLD                                                            | Blood-oxygen-level-dependent                                                                                                       |
| dMRI                                                            | Diffusion MRI                                                                                                                      |
| DTI                                                             | Diffusion tensor imaging                                                                                                           |
| DWI                                                             | Diffusion weighted imaging                                                                                                         |
| EPI                                                             | Echo-planar imaging                                                                                                                |
| fMRI                                                            | Functional MRI                                                                                                                     |
| FOV                                                             | Field of view                                                                                                                      |
| HARDI                                                           | High angular resolution diffusion imaging                                                                                          |
| LGN                                                             | Lateral geniculate nucleus                                                                                                         |
| NSA                                                             | Number of signal averages                                                                                                          |
| ODF                                                             | Orientation density function                                                                                                       |
| OR                                                              | Optic radiation                                                                                                                    |
| PDF                                                             | Probability density function                                                                                                       |
| TE                                                              | Echo time                                                                                                                          |
| TR                                                              | Repetition time                                                                                                                    |
