# Supplementary material for: Evaluating Contextual Processing in Diffusion MRI: Application to Optic Radiation Reconstruction for Epilepsy Surgery
Source: PubMed Central journal article supplement (PMC4117467; doi:10.1371/journal.pone.0101524), 2014-07-31
Supplement: pone.0101524.s002.pdf [file pone.0101524.s002.pdf]

## Appendix S2: Enhancement and sharpening

### 1 Moving frame of reference

Expressions for the moving frame of reference without using Euler angles [1, 2]:

$$\begin{aligned}
\mathcal{A}_1 U(\mathbf{x}, \mathbf{n}) &= \lim_{h \rightarrow 0} \frac{U(\mathbf{x} + h R_{\mathbf{n}} \mathbf{e}_x, \mathbf{n}) - U(\mathbf{x}, \mathbf{n})}{h} \\
\mathcal{A}_2 U(\mathbf{x}, \mathbf{n}) &= \lim_{h \rightarrow 0} \frac{U(\mathbf{x} + h R_{\mathbf{n}} \mathbf{e}_y, \mathbf{n}) - U(\mathbf{x}, \mathbf{n})}{h} \\
\mathcal{A}_3 U(\mathbf{x}, \mathbf{n}) &= \lim_{h \rightarrow 0} \frac{U(\mathbf{x} + h R_{\mathbf{n}} \mathbf{e}_z, \mathbf{n}) - U(\mathbf{x}, \mathbf{n})}{h} \\
\mathcal{A}_4 U(\mathbf{x}, \mathbf{n}) &= \lim_{h_a \rightarrow 0} \frac{U(\mathbf{x} + R_{\mathbf{n}} R_{h_a}^{\mathbf{e}_x} \mathbf{e}_z, \mathbf{n}) - U(\mathbf{x}, \mathbf{n})}{h_a} \\
\mathcal{A}_5 U(\mathbf{x}, \mathbf{n}) &= \lim_{h_a \rightarrow 0} \frac{U(\mathbf{x} + R_{\mathbf{n}} R_{h_a}^{\mathbf{e}_y} \mathbf{e}_z, \mathbf{n}) - U(\mathbf{x}, \mathbf{n})}{h_a}.
\end{aligned} \tag{1}$$

Where  $R_{\mathbf{n}}$  is any rotation which rotates  $\mathbf{e}_z$  to  $\mathbf{n}$  via  $\mathbf{n} = R_{\mathbf{n}} \mathbf{e}_z$ , and  $R_{h_a}^{\mathbf{e}_i}$  denotes a counterclockwise rotation of angle  $h_a$  around  $\mathbf{e}_i$ . Although the choice of  $R_{\mathbf{n}}$  does matter in the derivatives in Eq. 1, in the combinations used in the enhancement and sharpening operations it does not.

### 2 Convolution for linear contour enhancement

The following analytical approximation for the convolution kernel for linear contour enhancement in  $\mathbb{R}^3 \times S^2$  can be derived from  $\mathbb{R}^2 \times S^1$  kernels (for further details see [1]):

$$p_{D^{33}, D^{44}, t}^{\mathbb{R}^3 \times S^2}(x, y, z, \mathbf{n}(\tilde{\beta}, \tilde{\gamma})) = p_{D^{33}, D^{44}, t}^{\mathbb{R}^2 \times S^1}(z/2, x, \tilde{\beta}) p_{D^{33}, D^{44}, t}^{\mathbb{R}^2 \times S^1}(z/2, -y, \tilde{\gamma}) \tag{2}$$

$$\text{with } p_{D^{33}, D^{44}, t}^{\mathbb{R}^2 \times S^1}(x, y, \theta) = \tag{3}$$

$$\begin{cases} \frac{1}{4\pi t^2 D^{33} D^{44}} \exp\left(-\frac{1}{4t} \sqrt{\left(\frac{\theta^2}{D^{44}} + \frac{\theta^2(y - (-x \sin \theta + y \cos \theta))^2}{4(1 - \cos \theta)^2 D^{33}}\right)^2} + \frac{1}{D^{33} D^{44}} \left|\frac{\theta((x \cos \theta + y \sin \theta) - x)}{2(1 - \cos \theta)}\right|^2\right), & \text{if } \theta \neq 0 \\ \frac{1}{4\pi t^2 D^{33} D^{44}} \exp\left(-\frac{1}{4t} \sqrt{\left(\frac{x^2}{D^{33}}\right)^2 + \frac{y^2}{D^{33} D^{44}}}\right), & \text{if } \theta = 0. \end{cases} \tag{4}$$

Convolution in  $\mathbb{R}^3 \times S^2$  is then obtained by

$$\begin{aligned}
W(\mathbf{x}, \mathbf{n}, t) &= (p_{D^{33}, D^{44}, t}^{\mathbb{R}^3 \times S^2} *_{\mathbb{R}^3 \times S^2} U)(\mathbf{x}, \mathbf{n}) \\
&= \int_{\mathbb{R}^3} \int_{S^2} p_{D^{33}, D^{44}, t}^{\mathbb{R}^3 \times S^2}(R_{\mathbf{n}'}^T(\mathbf{x} - \mathbf{x}'), R_{\mathbf{n}}^T \mathbf{n}) U(\mathbf{x}', \mathbf{n}') d\sigma(\mathbf{n}') d\mathbf{x}',
\end{aligned} \tag{5}$$

in which the kernel is both rotated and translated, and multiplied with the image.

### 3 Finite differences

Implementation of forward finite difference schemes to approximate Eq. (5) in the manuscript for linear contour enhancement is done as follows [2]:

$$\begin{cases} W(\mathbf{x}, \mathbf{n}, t + \Delta t) = W(\mathbf{x}, \mathbf{n}, t) + \Delta t (D^{33} (\mathcal{A}_3^c)^2 + D^{44} ((\mathcal{A}_4^c)^2 + (\mathcal{A}_5^c)^2) W)(\mathbf{x}, \mathbf{n}, t) \\ W(\mathbf{x}, \mathbf{n}, 0) = U(\mathbf{x}, \mathbf{n}), \end{cases} \tag{6}$$

with

$$((\mathcal{A}_1^c)^2 U)(\mathbf{y}, \mathbf{n}) = \frac{U(\mathbf{x} + hR_{\mathbf{n}}\mathbf{e}_x, \mathbf{n}) - 2U(\mathbf{x}, \mathbf{n}) + U(\mathbf{x} - hR_{\mathbf{n}}\mathbf{e}_x, \mathbf{n})}{h^2} \quad (7)$$

$$((\mathcal{A}_2^c)^2 U)(\mathbf{y}, \mathbf{n}) = \frac{U(\mathbf{x} + hR_{\mathbf{n}}\mathbf{e}_y, \mathbf{n}) - 2U(\mathbf{x}, \mathbf{n}) + U(\mathbf{x} - hR_{\mathbf{n}}\mathbf{e}_y, \mathbf{n})}{h^2} \quad (8)$$

$$((\mathcal{A}_3^c)^2 U)(\mathbf{y}, \mathbf{n}) = \frac{U(\mathbf{x} + hR_{\mathbf{n}}\mathbf{e}_z, \mathbf{n}) - 2U(\mathbf{x}, \mathbf{n}) + U(\mathbf{x} - hR_{\mathbf{n}}\mathbf{e}_z, \mathbf{n})}{h^2} \quad (9)$$

$$((\mathcal{A}_4^c)^2 U)(\mathbf{y}, \mathbf{n}) = \frac{U(\mathbf{x}, R_{\mathbf{n}} R_{h_a}^{\mathbf{e}_x} \mathbf{e}_z) - 2U(\mathbf{x}, \mathbf{n}) + U(\mathbf{x}, R_{\mathbf{n}} R_{-h_a}^{\mathbf{e}_x} \mathbf{e}_z)}{h_a^2} \quad (10)$$

$$((\mathcal{A}_5^c)^2 U)(\mathbf{y}, \mathbf{n}) = \frac{U(\mathbf{x}, R_{\mathbf{n}} R_{h_a}^{\mathbf{e}_y} \mathbf{e}_z) - 2U(\mathbf{x}, \mathbf{n}) + U(\mathbf{x}, R_{\mathbf{n}} R_{-h_a}^{\mathbf{e}_y} \mathbf{e}_z)}{h_a^2}. \quad (11)$$

Here, the superscript  $c$  denotes that we use centered finite differences (in this case of second order). For more information on this numerical implementation and its stability, see [2]. For the finite difference implementation of erosions, [3] and [4] can be consulted.

## References

1. Duits R, Franken E (2011) Left-Invariant Diffusions on the Space of Positions and Orientations and their Application to Crossing-Preserving Smoothing of HARDI images. *Int J Comput Vis* 92: 231–264.
2. Creusen E, Duits R, Vilanova A, Florack L (2013) Numerical Schemes for Linear and Non-Linear Enhancement of DW-MRI. *Numer Math Theory Methods and Appl* 6: 138–168.
3. Duits R, Dela Haije T, Creusen E, Ghosh A (2013) Morphological and Linear Scale Spaces for Fiber Enhancement in DW-MRI. *J Math Imaging Vis* 46: 326–368.
4. Dela Haije TCJ, Duits R, Tax CMW (2014) Sharpening Fibers in Diffusion Weighted MRI via Erosion. In: Westin C, Vilanova A, Burgeth B, editors, *Visualization and Processing of Tensors and Higher Order Descriptors for Multi-Valued Data*, Springer. (in press).
